# Supplementary material for: Identification of Heterotic Groups and Patterns Based on Genotypic and Phenotypic Characteristics Among Rice Accessions of Diverse Origins
Source: Front Genet. 2022 Jan 28;13:811124. doi: 10.3389/fgene.2022.811124 (PMC8832281; doi:10.3389/fgene.2022.811124)
Supplement: Supplementary file 2 [file Table5.xlsx]

## Sheet: Genetic Distances
	Table S5. Genetic distances of the commercially used heterotic groups and new identified heterotic groups.
	C190 (V)	C203 (II)	C217 (IV)	C219 (IV)	C227 (IV)	C228 (IV)	C230 (IV)	C231 (VI)	C235 (III)	C239 (V)	C242 (II)	C243 (II)	C245 (II)	C248 (II)	C250 (V)	C251 (V)	C257 (II)	C265 (V)	C269 (I)	C272 (IV)	C281 (II)	C288 (I)	C290 (I)	C296 (I)	C298 (II)	C300 (I)	C303 (V)	C319 (II)	C320 (V)	C330 (IV)	C381 (V)	C478 (IV)	C536 (II)	C418 (IV)	C482 (IV)	C484 (IV)	C485 (IV)	C486 (IV)	C218 (IV)	C277 (IV)	C479 (IV)	C417 (IV)	C368 (I)	C293 (I)	C2I6 (IV)	C267 (V)	C538 (V)	C199 (V)	C533 (II)
C190 (V)	0	0.269	0.288	0.285	0.29	0.277	0.285	0.272	0.288	0.158	0.239	0.189	0.305	0.213	0.161	0.199	0.259	0.088	0.312	0.292	0.323	0.3	0.294	0.329	0.284	0.278	0.226	0.267	0.205	0.281	0.199	0.351	0.271	0.259	0.218	0.229	0.234	0.239	0.273	0.311	0.241	0.302	0.346	0.322	0.268	0.02	0.047	0.069	0.269
C203 (II)		0	0.335	0.337	0.346	0.265	0.326	0.285	0.335	0.266	0.229	0.215	0.249	0.231	0.276	0.221	0.159	0.261	0.287	0.325	0.236	0.359	0.343	0.369	0.083	0.226	0.248	0.28	0.275	0.33	0.289	0.338	0.23	0.275	0.272	0.311	0.308	0.273	0.324	0.347	0.296	0.324	0.239	0.374	0.328	0.266	0.267	0.277	0.013
C217 (IV)			0	0.02	0.183	0.322	0.17	0.305	0.29	0.303	0.335	0.305	0.332	0.342	0.315	0.324	0.318	0.276	0.319	0.062	0.351	0.182	0.225	0.276	0.347	0.317	0.317	0.334	0.318	0.056	0.334	0.039	0.342	0.247	0.264	0.223	0.221	0.258	0.15	0.31	0.245	0.107	0.224	0.256	0.101	0.291	0.295	0.279	0.338
C219 (IV)				0	0.179	0.319	0.168	0.307	0.286	0.3	0.334	0.302	0.335	0.339	0.312	0.324	0.316	0.272	0.317	0.049	0.354	0.175	0.223	0.273	0.349	0.322	0.314	0.335	0.314	0.047	0.331	0.032	0.345	0.242	0.261	0.22	0.218	0.255	0.151	0.305	0.245	0.105	0.218	0.252	0.088	0.288	0.293	0.276	0.341
C227 (IV)					0	0.28	0.204	0.298	0.275	0.317	0.317	0.314	0.323	0.322	0.316	0.302	0.322	0.273	0.341	0.188	0.325	0.245	0.275	0.301	0.349	0.345	0.303	0.322	0.3	0.16	0.323	0.19	0.332	0.263	0.268	0.24	0.247	0.276	0.194	0.174	0.25	0.211	0.262	0.282	0.183	0.289	0.298	0.279	0.348
C228 (IV)						0	0.291	0.276	0.29	0.209	0.263	0.221	0.286	0.238	0.216	0.227	0.248	0.289	0.283	0.322	0.318	0.322	0.313	0.336	0.269	0.273	0.245	0.294	0.226	0.31	0.251	0.325	0.302	0.247	0.084	0.114	0.113	0.08	0.299	0.263	0.273	0.305	0.337	0.352	0.302	0.218	0.215	0.229	0.266
C230 (IV)							0	0.294	0.285	0.285	0.307	0.316	0.336	0.325	0.295	0.32	0.312	0.286	0.345	0.165	0.333	0.269	0.292	0.317	0.328	0.338	0.322	0.314	0.309	0.158	0.299	0.169	0.316	0.274	0.259	0.246	0.244	0.266	0.032	0.274	0.248	0.103	0.304	0.313	0.115	0.285	0.291	0.281	0.33
C231 (VI)								0	0.301	0.304	0.304	0.289	0.315	0.271	0.293	0.293	0.291	0.273	0.322	0.312	0.315	0.316	0.308	0.319	0.286	0.289	0.335	0.315	0.296	0.301	0.31	0.311	0.303	0.302	0.301	0.298	0.294	0.273	0.291	0.321	0.277	0.327	0.322	0.321	0.31	0.271	0.271	0.275	0.287
C235 (III)									0	0.299	0.306	0.299	0.36	0.319	0.304	0.306	0.309	0.288	0.328	0.291	0.35	0.265	0.274	0.307	0.338	0.317	0.327	0.32	0.31	0.286	0.314	0.292	0.288	0.291	0.299	0.283	0.278	0.287	0.275	0.313	0.311	0.318	0.263	0.295	0.296	0.287	0.286	0.278	0.338
C239 (V)										0	0.244	0.197	0.296	0.221	0.134	0.229	0.251	0.174	0.306	0.314	0.326	0.334	0.328	0.363	0.276	0.26	0.224	0.261	0.179	0.294	0.17	0.3	0.268	0.234	0.213	0.203	0.205	0.231	0.277	0.295	0.221	0.296	0.358	0.342	0.289	0.157	0.164	0.178	0.27
C242 (II)											0	0.241	0.296	0.184	0.237	0.247	0.205	0.269	0.334	0.319	0.293	0.341	0.32	0.333	0.215	0.266	0.278	0.275	0.283	0.326	0.261	0.337	0.277	0.293	0.274	0.289	0.294	0.273	0.308	0.299	0.255	0.307	0.35	0.345	0.316	0.243	0.246	0.262	0.231
C243 (II)												0	0.259	0.226	0.212	0.218	0.226	0.197	0.28	0.307	0.292	0.316	0.303	0.339	0.209	0.225	0.244	0.25	0.233	0.291	0.223	0.306	0.266	0.231	0.225	0.22	0.221	0.214	0.307	0.303	0.267	0.314	0.344	0.335	0.283	0.185	0.195	0.198	0.22
C245 (II)													0	0.294	0.301	0.29	0.248	0.291	0.298	0.33	0.142	0.362	0.338	0.373	0.249	0.271	0.302	0.24	0.295	0.331	0.317	0.342	0.261	0.273	0.279	0.29	0.286	0.289	0.33	0.308	0.294	0.333	0.363	0.356	0.33	0.308	0.312	0.315	0.248
C248 (II)														0	0.206	0.24	0.226	0.232	0.298	0.335	0.312	0.337	0.316	0.363	0.237	0.257	0.263	0.285	0.221	0.327	0.234	0.339	0.28	0.259	0.244	0.275	0.281	0.257	0.312	0.332	0.265	0.33	0.353	0.355	0.318	0.215	0.213	0.224	0.235
C250 (V)															0	0.226	0.272	0.178	0.302	0.32	0.325	0.334	0.327	0.362	0.287	0.276	0.237	0.25	0.105	0.308	0.116	0.312	0.283	0.251	0.222	0.221	0.226	0.245	0.289	0.302	0.226	0.311	0.366	0.349	0.296	0.158	0.171	0.163	0.277
C251 (V)																0	0.204	0.204	0.328	0.331	0.274	0.343	0.305	0.342	0.255	0.278	0.19	0.28	0.229	0.314	0.234	0.327	0.284	0.262	0.25	0.267	0.264	0.244	0.306	0.304	0.261	0.341	0.339	0.327	0.314	0.203	0.216	0.213	0.222
C257 (II)																	0	0.264	0.265	0.309	0.255	0.35	0.324	0.363	0.168	0.222	0.275	0.276	0.271	0.309	0.297	0.321	0.227	0.265	0.263	0.277	0.273	0.248	0.298	0.321	0.248	0.314	0.35	0.36	0.302	0.261	0.26	0.265	0.159
C265 (V)																		0	0.293	0.289	0.313	0.298	0.285	0.333	0.288	0.262	0.242	0.278	0.186	0.271	0.221	0.283	0.284	0.249	0.21	0.225	0.228	0.23	0.273	0.297	0.258	0.299	0.336	0.322	0.262	0.084	0.104	0.09	0.264
C269 (I)																			0	0.319	0.342	0.353	0.329	0.383	0.277	0.166	0.342	0.316	0.307	0.31	0.33	0.316	0.299	0.314	0.301	0.284	0.284	0.267	0.328	0.367	0.324	0.348	0.367	0.384	0.317	0.314	0.316	0.315	0.291
C272 (IV)																				0	0.347	0.2	0.25	0.287	0.338	0.318	0.325	0.338	0.327	0.052	0.327	0.066	0.33	0.168	0.251	0.23	0.227	0.26	0.15	0.316	0.243	0.086	0.237	0.267	0.114	0.293	0.299	0.289	0.327
C281 (II)																					0	0.379	0.359	0.368	0.26	0.28	0.265	0.215	0.315	0.352	0.304	0.362	0.275	0.35	0.315	0.319	0.312	0.316	0.332	0.317	0.321	0.349	0.389	0.355	0.356	0.325	0.327	0.33	0.236
C288 (I)																						0	0.191	0.194	0.36	0.358	0.328	0.353	0.336	0.192	0.36	0.192	0.368	0.291	0.28	0.266	0.267	0.276	0.261	0.316	0.293	0.236	0.15	0.166	0.213	0.303	0.296	0.295	0.361
C290 (I)																							0	0.25	0.345	0.328	0.315	0.339	0.315	0.237	0.346	0.234	0.363	0.317	0.317	0.3	0.3	0.284	0.278	0.306	0.309	0.28	0.307	0.245	0.234	0.299	0.297	0.287	0.345
C296 (I)																								0	0.36	0.376	0.344	0.362	0.361	0.277	0.381	0.278	0.385	0.333	0.337	0.331	0.329	0.322	0.322	0.316	0.336	0.294	0.233	0.112	0.294	0.335	0.326	0.328	0.372
C298 (II)																									0	0.226	0.286	0.278	0.287	0.341	0.295	0.35	0.236	0.29	0.277	0.307	0.304	0.274	0.334	0.336	0.288	0.328	0.377	0.368	0.339	0.284	0.29	0.292	0.081
C300 (I)																										0	0.299	0.282	0.292	0.318	0.267	0.326	0.27	0.288	0.268	0.287	0.28	0.272	0.329	0.346	0.295	0.343	0.369	0.361	0.326	0.279	0.28	0.279	0.299
C303 (V)																											0	0.274	0.237	0.312	0.237	0.315	0.277	0.291	0.255	0.267	0.267	0.253	0.31	0.302	0.291	0.333	0.334	0.331	0.304	0.229	0.24	0.252	0.249
C319 (II)																												0	0.264	0.334	0.256	0.333	0.282	0.27	0.296	0.28	0.276	0.292	0.308	0.298	0.292	0.33	0.366	0.352	0.321	0.27	0.184	0.281	0.279
C320 (V)																													0	0.313	0.179	0.312	0.298	0.256	0.245	0.233	0.235	0.25	0.301	0.29	0.271	0.313	0.34	0.356	0.3	0.201	0.291	0.16	0.277
C330 (IV)																														0	0.327	0.064	0.338	0.221	0.249	0.216	0.214	0.248	0.143	0.318	0.241	0.104	0.222	0.258	0.11	0.283	0.341	0.276	0.333
C381 (V)																															0	0.328	0.284	0.273	0.24	0.248	0.247	0.273	0.293	0.307	0.279	0.322	0.382	0.348	0.306	0.201	0.203	0.207	0.29
C478 (IV)																																0	0.345	0.25	0.267	0.229	0.227	0.258	0.15	0.312	0.251	0.104	0.23	0.264	0.094	0.294	0.298	0.283	0.341
C536 (II)																																	0	0.296	0.292	0.314	0.313	0.305	0.305	0.322	0.315	0.339	0.381	0.36	0.336	0.272	0.274	0.28	0.234
C418 (IV)																																		0	0.202	0.213	0.205	0.241	0.266	0.303	0.268	0.247	0.305	0.313	0.257	0.252	0.25	0.199	0.276
C482 (IV)																																			0	0.107	0.105	0.13	0.268	0.273	0.278	0.237	0.318	0.314	0.267	0.22	0.22	0.23	0.271
C484 (IV)																																				0	0.017	0.103	0.238	0.253	0.245	0.23	0.313	0.314	0.231	0.26	0.228	0.242	0.313
C485 (IV)																																					0	0.098	0.235	0.252	0.25	0.23	0.306	0.312	0.237	0.24	0.233	0.246	0.309
C486 (IV)																																						0	0.258	0.276	0.264	0.262	0.296	0.321	0.255	0.24	0.238	0.251	0.275
C218 (IV)																																							0	0.273	0.243	0.115	0.292	0.303	0.103	0.273	0.279	0.268	0.328
C277 (IV)																																								0	0.287	0.31	0.327	0.307	0.285	0.311	0.315	0.299	0.347
C479 (IV)																																									0	0.262	0.341	0.337	0.236	0.245	0.25	0.253	0.295
C417 (IV)																																										0	0.272	0.292	0.142	0.302	0.309	0.296	0.326
C368 (I)																																											0	0.218	0.255	0.351	0.348	0.329	0.372
C293 (I)																																												0	0.282	0.325	0.318	0.323	0.373
C2I6 (IV)																																													0	0.272	0.275	0.262	0.332
C267 (V)																																														0	0.056	0.065	0.269
C538 (V)																																															0	0.098	0.268
C199 (V)																																																0	0.28
C533 (II)																																																	0
C502 (II)
C537 (II)
C573 (II)
C303 (V)
C534 (V)
C299 (II)
C308 (II)
C309 (II)
									Minimum distance			0.01
									Maximum distance			0.391
									Average			0.275626
[truncated: 8 more columns]
